# Supplementary material
Source: PubMed Central journal article supplement (PMC2770891)
Supplement: NIHMS152735-supplement-01.pdf [file NIHMS152735-supplement-01.pdf]

## Supporting Information for

Bionectriol A, a Polyketide Glycoside from the Fungus *Bionectria* sp.

Associated with the Fungus-Growing Ant, *Apterostigma dentigerum*

Elizaveta Freinkman,<sup>1</sup> Dong-Chan Oh,<sup>2</sup> Jarrod J. Scott,<sup>3</sup> Cameron R. Currie,<sup>3</sup> and Jon Clardy<sup>1,2\*</sup>

<sup>1</sup>*Chemical Biology Graduate Program, Harvard Medical School, Boston, MA 02115*

<sup>2</sup>*Department of Biological Chemistry and Molecular Pharmacology, Harvard Medical School, Boston, MA 02115*

<sup>3</sup>*Department of Bacteriology, University of Wisconsin-Madison, Madison, WI 53706*

\*Corresponding author: [jon\\_clardy@hms.harvard.edu](mailto:jon_clardy@hms.harvard.edu)

## Table of Contents

S1. Table of Contents

S2.  $^1\text{H}$  NMR spectrum of bionectriol A (**1**) in  $\text{CD}_3\text{OD}$

S3.  $^{13}\text{C}$  NMR spectrum of bionectriol A (**1**) in  $\text{CD}_3\text{OD}$

S4. gCOSY NMR spectrum of bionectriol A (**1**) in  $\text{CD}_3\text{OD}$

S5. ROESY NMR spectrum of bionectriol A (**1**) in  $\text{CD}_3\text{OD}$

S6. gHSQC NMR spectrum of bionectriol A (**1**) in  $\text{CD}_3\text{OD}$

S7. gHMBC NMR spectrum of bionectriol A (**1**) in  $\text{CD}_3\text{OD}$

S8. Phylogenetic analysis of CC061026-06

$^1\text{H}$  NMR spectrum of bionectriol A (1) in  $\text{CD}_3\text{OD}$

Bionectriol A

Automation directory: /export/home/oh/vnmrsys/data/aut\_2008.04.24  
File: /export/home/oh/Lisa/proton.fid  
Sample id: tmpstudy

Pulse Sequence: s2pu1

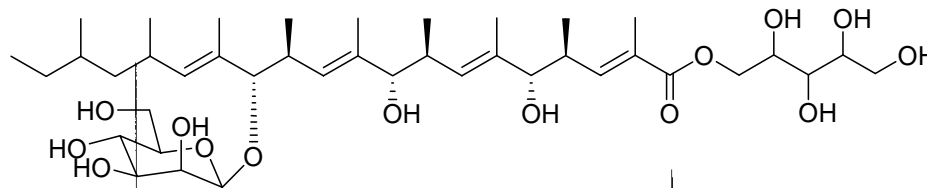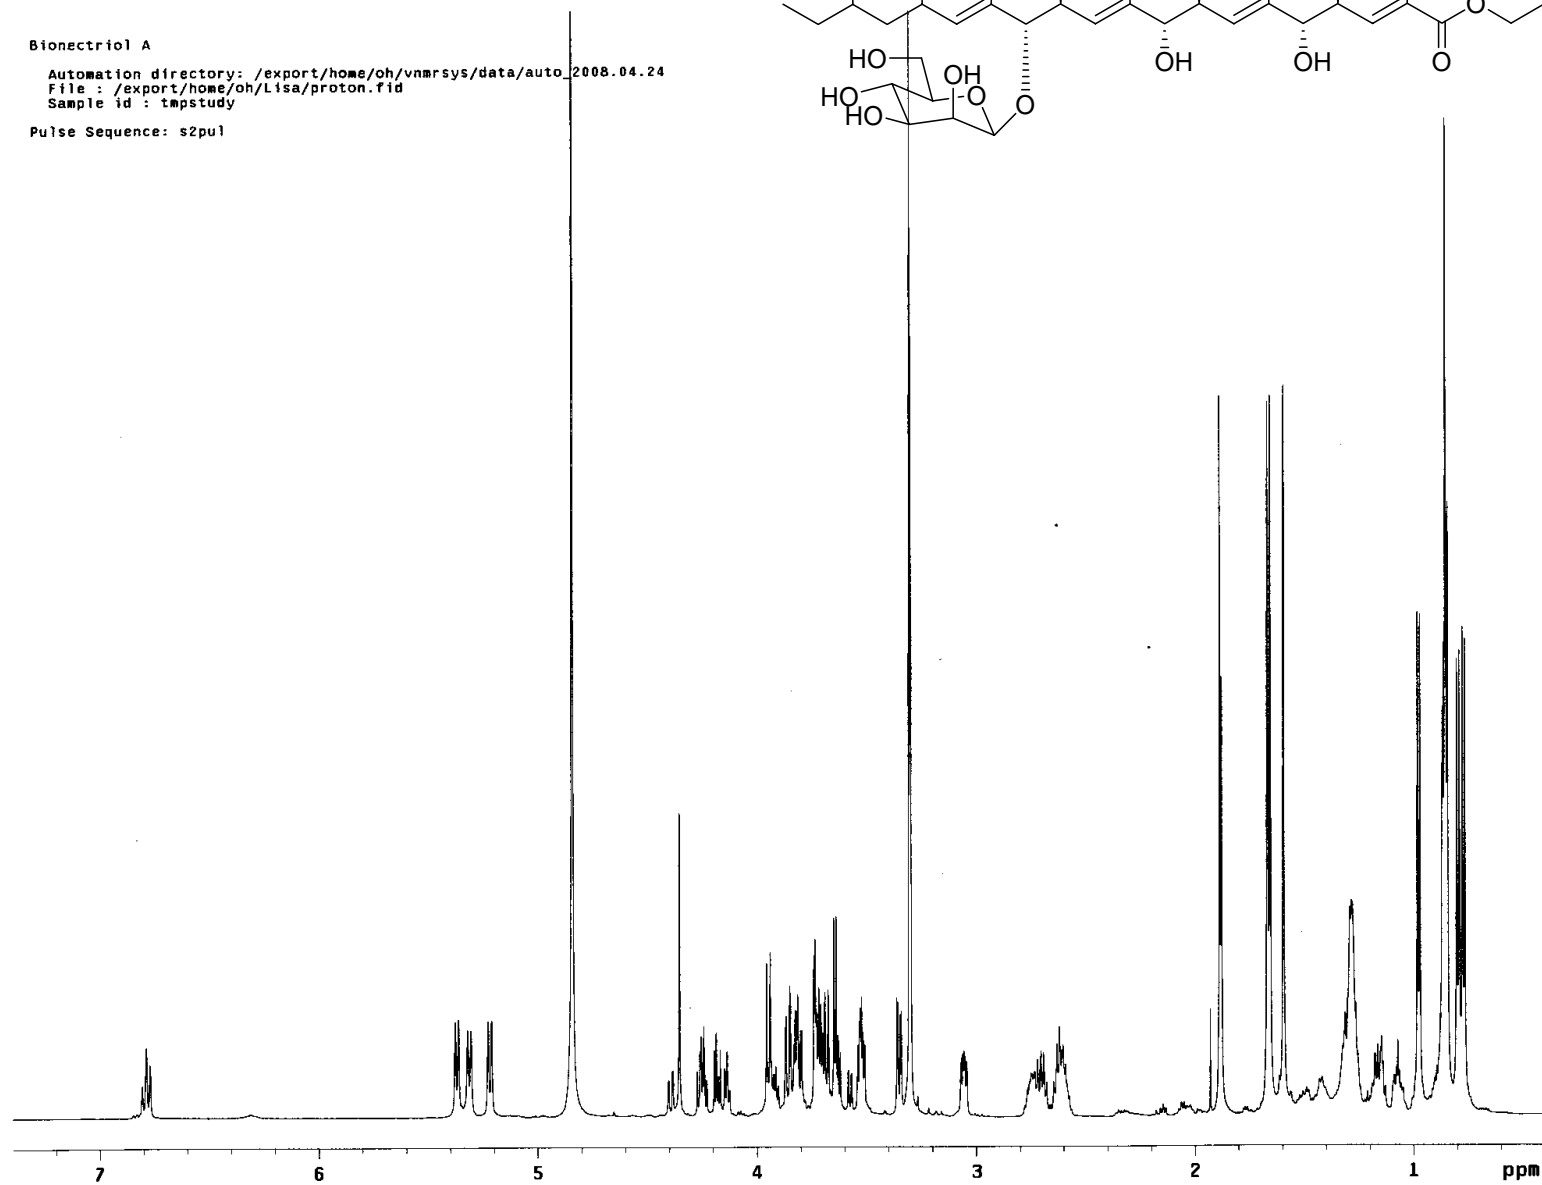

<sup>13</sup>C NMR spectrum of bionectriol A (1) in CD<sub>3</sub>OD

Bionectriol A

Automation directory: /export/home/oh/vnmrsys/data/auto\_2008.04.24  
File : /export/home/oh/cc\_13c.fid  
Sample id : tmpstudy

Pulse Sequence: s2pu1

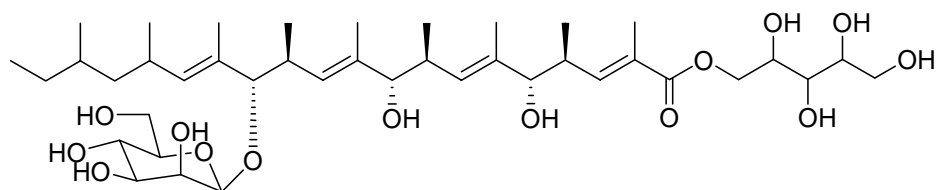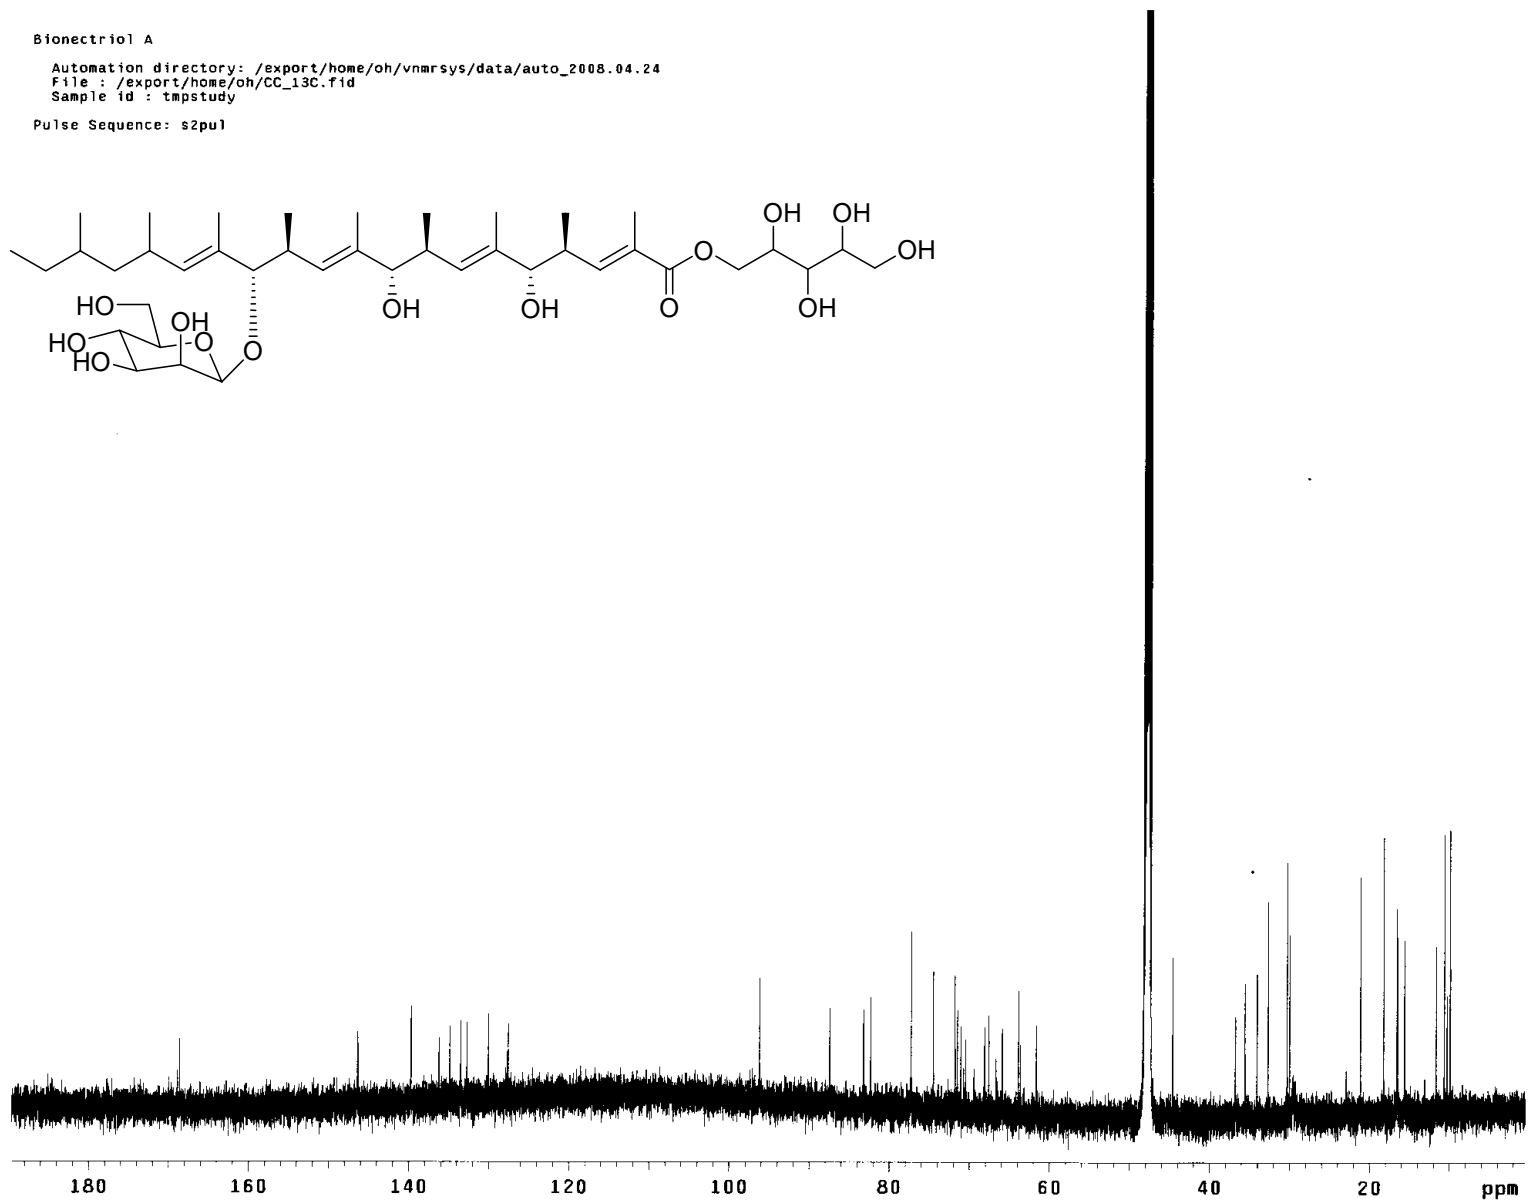

gCOSY NMR spectrum of bionectriol A (1) in CD<sub>3</sub>OD

STANDARD 1H OBSERVE - profile

Automation directory: /export/home/oh/vnmrsys/data/auto\_2008.04.24  
 File : /export/home/oh/Lisa/COSY.fid  
 Sample id : tmpstudy

Pulse Sequence: gCOSY

Solvent: cd3od  
 Temp: 25.0 C / 298.1 K  
 Operator: freinkma  
 File: COSY  
 VNMR5-600 "nmr"

Relax. delay 1.301 sec  
 Acq. time 0.213 sec  
 Width 4807.7 Hz  
 2D Width 4807.7 Hz  
 16 repetitions  
 128 increments  
 OBSERVE H1, 599.7703395 MHz  
 DATA PROCESSING  
 Sine bell 0.106 sec  
 F1 DATA PROCESSING  
 Sine bell 0.053 sec  
 FT size 2048 x 2048  
 Total time 52 min, 58 sec

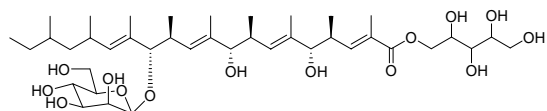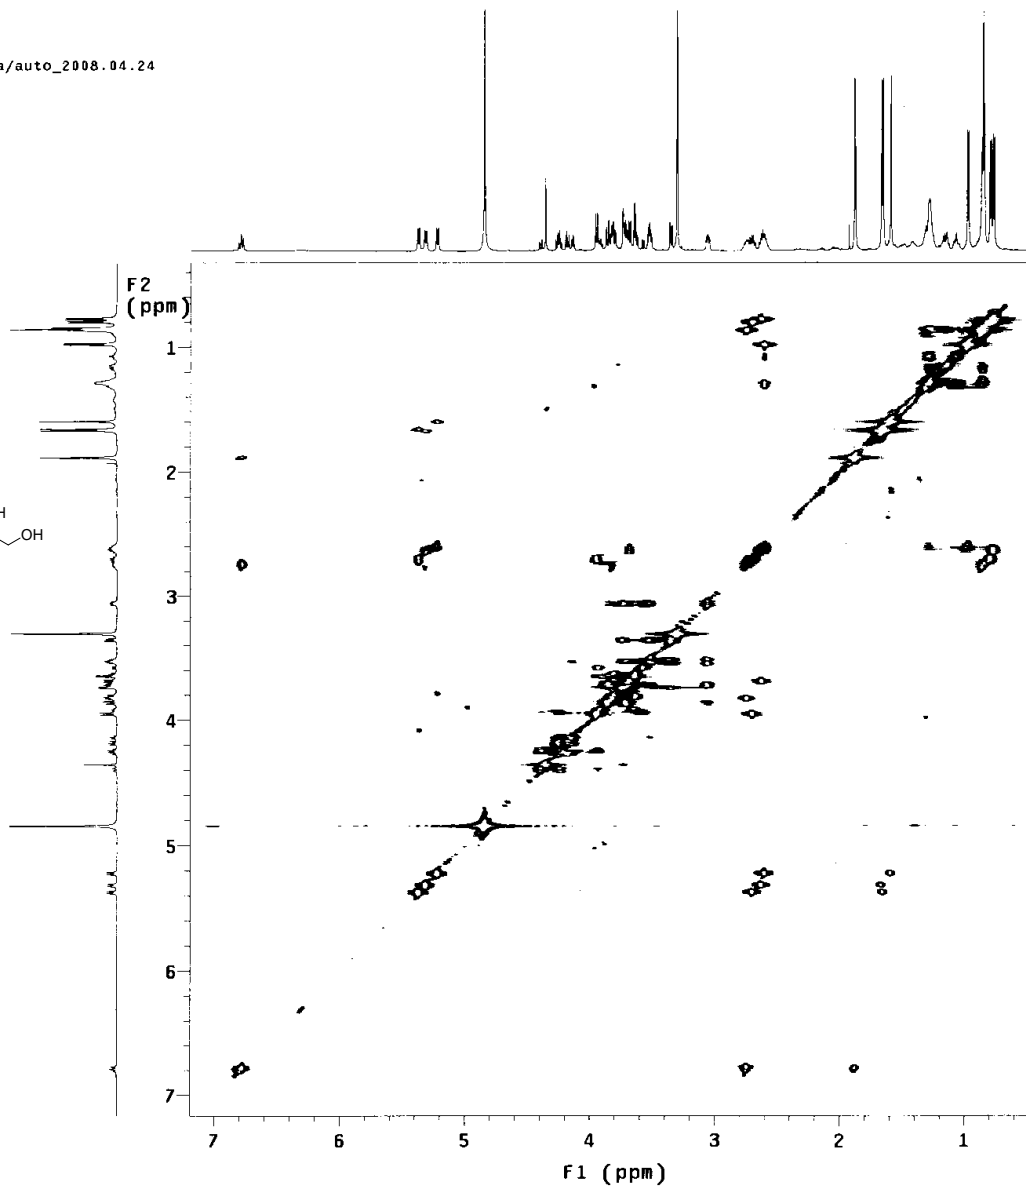

# ROESY NMR spectrum of bionectriol A (1) in CD<sub>3</sub>OD

STANDARD 1H OBSERVE - profile

Automation directory: /export/home/oh/vnmrsys/data/auto\_2008.04.24  
 File: /export/home/oh/Lisa/ROESYf1dd  
 Sample id: tmpstudy

Pulse Sequence: gBBSQZ  
 Solvent: cd3od  
 Temp: 25.0 C / 298.1 K  
 Operator: freinkma  
 File: ROESY  
 VNMRS-600 "nmr"

Relax. delay 1.000 sec  
 Mixing 0.200 sec  
 Acq. time 0.213 sec  
 Width 4807.7 Hz  
 2D Width 4807.7 Hz  
 32 repetitions  
 2 x 128 increments  
 OBSERVE H1, 599.7703395 MHz  
 DATA PROCESSING  
 Gauss apodization 0.098 sec  
 F1 DATA PROCESSING  
 Gauss apodization 0.038 sec  
 FT size 2048 x 2048  
 Total time 3 hr, 18 min, 17 sec

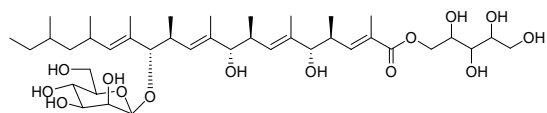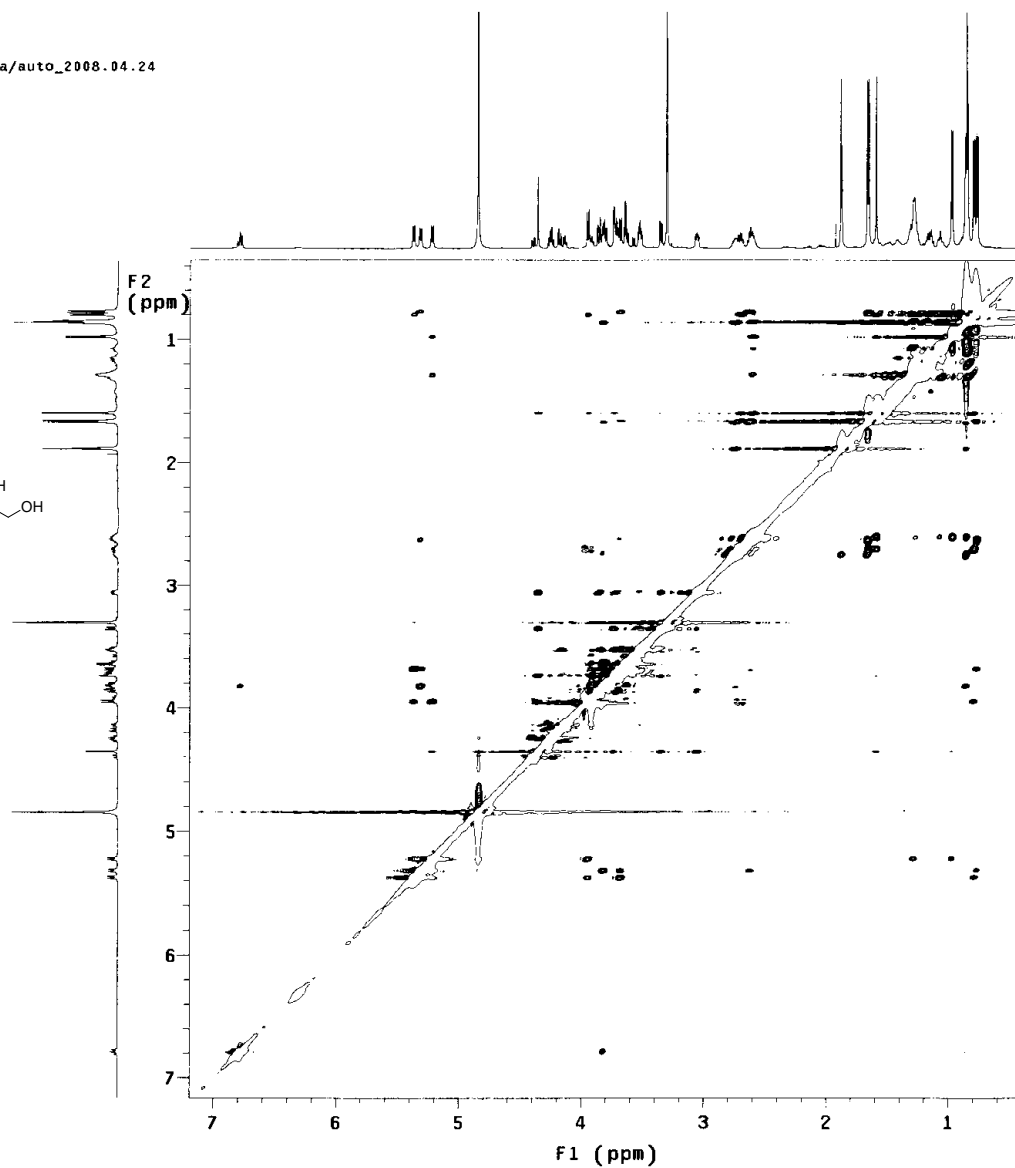







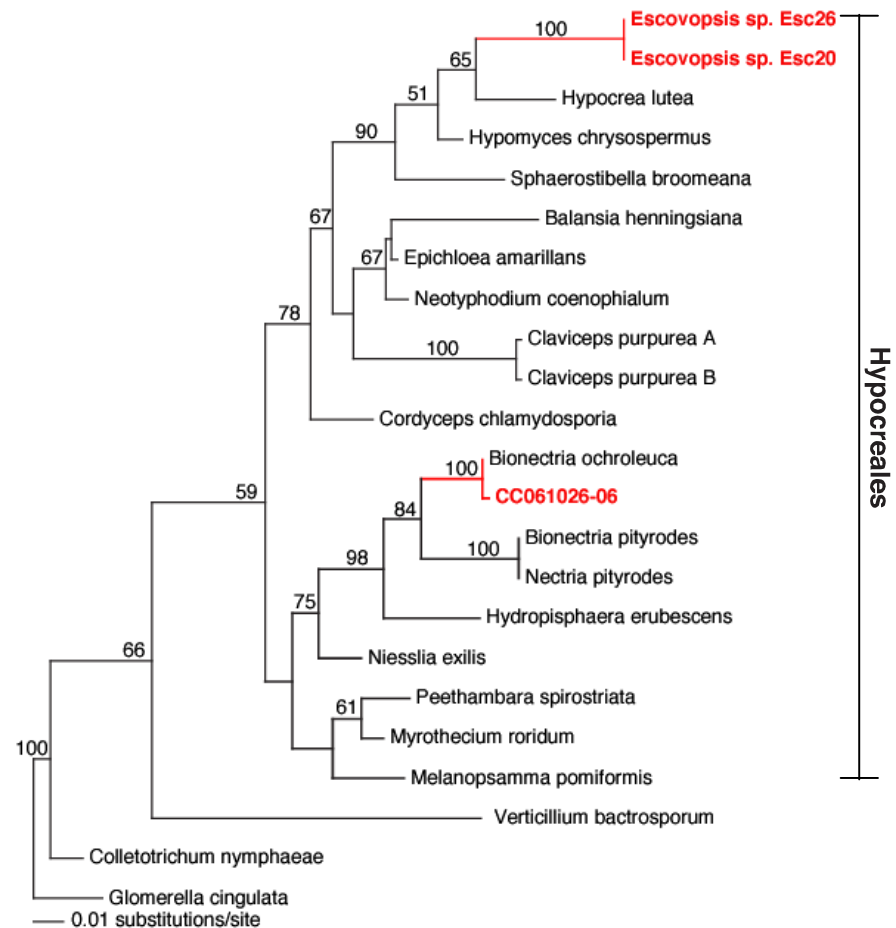

S8: Molecular phylogeny for the fungal strain CC061026-06. A maximum likelihood (ML) phylogenetic analysis of ~555 base-pairs of 28S rRNA gene sequences from 22 representative members of Hypocreomycetidae (Ascomycota), 19 of which were from the order Hypocreales. The remaining three (3) taxa were used as an outgroup for the analysis. Branch numbers represent bootstrap values for 100 pseudoreplicates under maximum likelihood analysis. Values below 50 are not included. Strong bootstrap support indicates that CC061026-06 (shown in red)

is most closely related to *Bionectria ochroleuca* and sister to *Bionectria pityrodes* and *Nectria pityrodes*. As part of this analysis we also included two strains of the pathogen known to infect the fungal gardens of *Apterotigma* ants, *Escovopsis* sp. (*Escovopsis* sp. Esc26 and *Escovopsis* sp. Esc20, also in red). Our analysis indicates that CC061026-06 is distantly related to the pathogen *Escovopsis* and thus we cannot be certain of its role in the system at this time.
